# Supplementary material for: Assessing health systems’ capacities to provide post-abortion care: insights from seven low- and middle-income countries
Source: PubMed Central journal article supplement (PMC11719741; doi:10.7189/jogh.15.04020), 2025-01-10
Supplement: jogh-15-04020-s001.pdf [file jogh-15-04020-s001.pdf]

**Supplement to: Raza S, Banik R, Noor STA, Jahan E, Sayeed A, Huq N, Arifeen SE, Ahmed A, Rahman AE. Assessing health systems' capacities to provide post-abortion care: insights from seven low- and middle-income countries. J Glob Health. 2025;15:04020.**

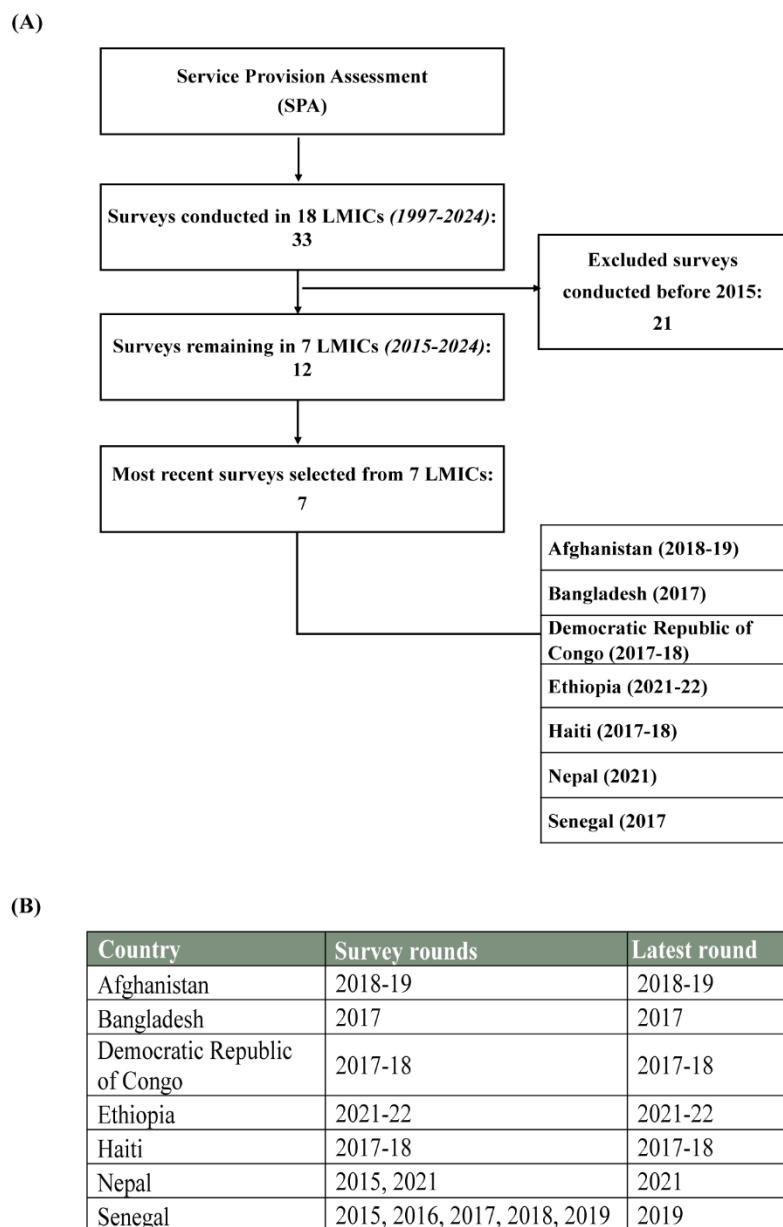

**Figure S1.** Availability of Service Provision Assessment (SPA) Surveys Conducted Across Countries from 2015 to 2024.

**Table S1.** Distribution of the surveyed data used in the final analysis

| Service Provision Assessment (SPA)<br>Survey year | Year    | Total                       |       | Primary                                          |       |                             |       | Referral                                         |       |                             |       |                                                  |  |
|---------------------------------------------------|---------|-----------------------------|-------|--------------------------------------------------|-------|-----------------------------|-------|--------------------------------------------------|-------|-----------------------------|-------|--------------------------------------------------|--|
|                                                   |         | Completed survey (Weighted) |       | Completed survey & provide deliveries (weighted) |       | Completed survey (Weighted) |       | Completed survey & provide deliveries (weighted) |       | Completed survey (Weighted) |       | Completed survey & provide deliveries (weighted) |  |
|                                                   |         | n                           | %     | n                                                | %     | n                           | %     | n                                                | %     | n                           | %     | n                                                |  |
| Afghanistan                                       | 2018-19 | 142                         | 78.73 | 112                                              | 0.54  | 76                          | 87.51 | 67                                               | 0.46  | 66                          | 68.52 | 45                                               |  |
| Bangladesh                                        | 2017    | 1524                        | 23.51 | 358                                              | 95.59 | 1061                        | 25.07 | 266                                              | 94.49 | 463                         | 19.87 | 92                                               |  |
| Nepal                                             | 2021    | 1576                        | 51.07 | 805                                              | 0.90  | 1415                        | 49.60 | 702                                              | 0.10  | 161                         | 63.90 | 103                                              |  |
| Democratic Republic of Congo                      | 2017-18 | 1380                        | 96.23 | 1328                                             | 0.90  | 1244                        | 96.14 | 1196                                             | 0.10  | 136                         | 97.49 | 132                                              |  |
| Ethiopia                                          | 2021-22 | 1158                        | 18.74 | 217                                              | 0.98  | 1134                        | 17.03 | 193                                              | 0.02  | 24                          | 98.27 | 24                                               |  |
| Senegal                                           | 2019    | 425                         | 57.11 | 243                                              | 0.97  | 412                         | 56.09 | 231                                              | 0.03  | 13                          | 89.76 | 12                                               |  |
| Haiti                                             | 2017-18 | 1007                        | 35.85 | 361                                              | 0.92  | 922                         | 32.10 | 296                                              | 0.08  | 85                          | 76.50 | 65                                               |  |

\* Completed interviews are those where the facility has completed all four components of the SPA survey: a facility inventory questionnaire, client-provider observation protocols, client exit questionnaires and health worker questionnaires.

**Table S2.** Signal functions for basic and comprehensive post-abortion care <sup>1</sup>

| Capacity to provide both basic and comprehensive post-abortion care                                                                                                                                                                                                                                                                           |                                                                                                                                                                                                                                                                                                                                                                                                                                             |
|-----------------------------------------------------------------------------------------------------------------------------------------------------------------------------------------------------------------------------------------------------------------------------------------------------------------------------------------------|---------------------------------------------------------------------------------------------------------------------------------------------------------------------------------------------------------------------------------------------------------------------------------------------------------------------------------------------------------------------------------------------------------------------------------------------|
| Expected functions for all facilities                                                                                                                                                                                                                                                                                                         |                                                                                                                                                                                                                                                                                                                                                                                                                                             |
| <ul style="list-style-type: none"> <li>1) Remove retained products of conception*</li> <li>2) Administer parenteral antibiotics*</li> <li>3) Administer parenteral uterotonics*</li> <li>4) Administer intravenous fluids†</li> <li>5) Provide at least one modern, short-acting family planning method at the time of the survey†</li> </ul> |                                                                                                                                                                                                                                                                                                                                                                                                                                             |
| Capacity to provide basic post-abortion care                                                                                                                                                                                                                                                                                                  | Capacity to provide comprehensive post-abortion care                                                                                                                                                                                                                                                                                                                                                                                        |
| Functions expected of primary-level health facilities                                                                                                                                                                                                                                                                                         | Functions expected of referral-level health facilities                                                                                                                                                                                                                                                                                                                                                                                      |
| <ul style="list-style-type: none"> <li>6) Communicate with referral facilities†</li> <li>7) Has a vehicle with fuel to transport patients needing referral†</li> <li>8) Has staff capable of undertaking normal deliveries on duty or who are on call for 24 hours per day, 7 days per week</li> </ul>                                        | <ul style="list-style-type: none"> <li>6) Administer a blood transfusion*</li> <li>7) Undertake major abdominal surgery (proxied by the provision of caesarean section) *</li> <li>8) Provide at least one long-acting, reversible family planning method† or permanent method at the time of the survey</li> <li>9) Has staff capable of doing caesarean sections on duty or who are on call 24 hours per day, 7 days per week‡</li> </ul> |

---

\*Assessed on the basis of facility reporting if they had ever provided the service. †Assessed on the basis of the availability and validity or functionality of a given item (drug or equipment) at the time of the survey. ‡We assumed that staff who were capable of doing caesarean sections were also capable of doing normal deliveries, and therefore did not include this factor in comprehensive capacity.

**Table S3.** Classification of primary and referral level health facilities across seven LMICs

| Country                             | Facilities classified as primary                                                                                                                                                                    | Facilities classified as referral                                                                                                                                                                                                                                                                                   |
|-------------------------------------|-----------------------------------------------------------------------------------------------------------------------------------------------------------------------------------------------------|---------------------------------------------------------------------------------------------------------------------------------------------------------------------------------------------------------------------------------------------------------------------------------------------------------------------|
| <b>Afghanistan</b>                  | <ul style="list-style-type: none"> <li>▪ Private clinic</li> </ul>                                                                                                                                  | <ul style="list-style-type: none"> <li>▪ Regional/ national hospital</li> <li>▪ Provincial hospital</li> <li>▪ Special hospital</li> <li>▪ Private hospital</li> </ul>                                                                                                                                              |
| <b>Bangladesh</b>                   | <ul style="list-style-type: none"> <li>▪ Community clinic</li> <li>▪ Union subcenter/ rural dispensary</li> <li>▪ Union Health and Family Welfare Center</li> <li>▪ NGO clinic</li> </ul>           | <ul style="list-style-type: none"> <li>▪ Upazila Health Complex District Hospital</li> <li>▪ Private Hospital (with &gt;20 beds)</li> <li>▪ NGO Hospital</li> <li>▪ Maternal and Child Welfare Center</li> </ul>                                                                                                    |
| <b>Nepal</b>                        | <ul style="list-style-type: none"> <li>▪ Primary Health Care Center (PHCC)</li> <li>▪ Health Post (HP)</li> <li>▪ Sub-Health Post (SHP)</li> <li>▪ Urban Health Center HTC (stand-alone)</li> </ul> | <ul style="list-style-type: none"> <li>▪ Central Government Hospital Regional</li> <li>▪ Government Hospital Sub-Regional</li> <li>▪ Government Hospital Zonal</li> <li>▪ Government Hospital District</li> <li>▪ Government Hospital Other Public Hospital</li> <li>▪ Other Hospitals (not state-owned)</li> </ul> |
| <b>Democratic Republic of Congo</b> | <ul style="list-style-type: none"> <li>▪ Primary Health Care Center</li> <li>▪ Health Center</li> </ul>                                                                                             | <ul style="list-style-type: none"> <li>▪ Tertiary / Provincial Hospital</li> <li>▪ General Referral Hospital</li> <li>▪ Hospital / Hospital Center / Clinic</li> </ul>                                                                                                                                              |
| <b>Ethiopia</b>                     | <ul style="list-style-type: none"> <li>▪ Health Center</li> <li>▪ Health Post</li> <li>▪ Higher Clinic</li> <li>▪ Medium Clinic</li> <li>▪ Lower Clinic</li> <li>▪ Specialty Clinic</li> </ul>      | <ul style="list-style-type: none"> <li>▪ Referral Hospital</li> <li>▪ General Hospital</li> <li>▪ Primary Hospital</li> </ul>                                                                                                                                                                                       |
| <b>Senegal</b>                      | <ul style="list-style-type: none"> <li>▪ Health Centre</li> <li>▪ Health post</li> <li>▪ Case de Sante (Health hut)</li> </ul>                                                                      | <ul style="list-style-type: none"> <li>▪ Hospital</li> </ul>                                                                                                                                                                                                                                                        |
| <b>Haiti</b>                        | <ul style="list-style-type: none"> <li>▪ Dispensary</li> <li>▪ Health Center without Lit</li> <li>▪ Health Center with Lit Community Referral Hospital</li> </ul>                                   | <ul style="list-style-type: none"> <li>▪ University Hospital Regional Hospital</li> </ul>                                                                                                                                                                                                                           |

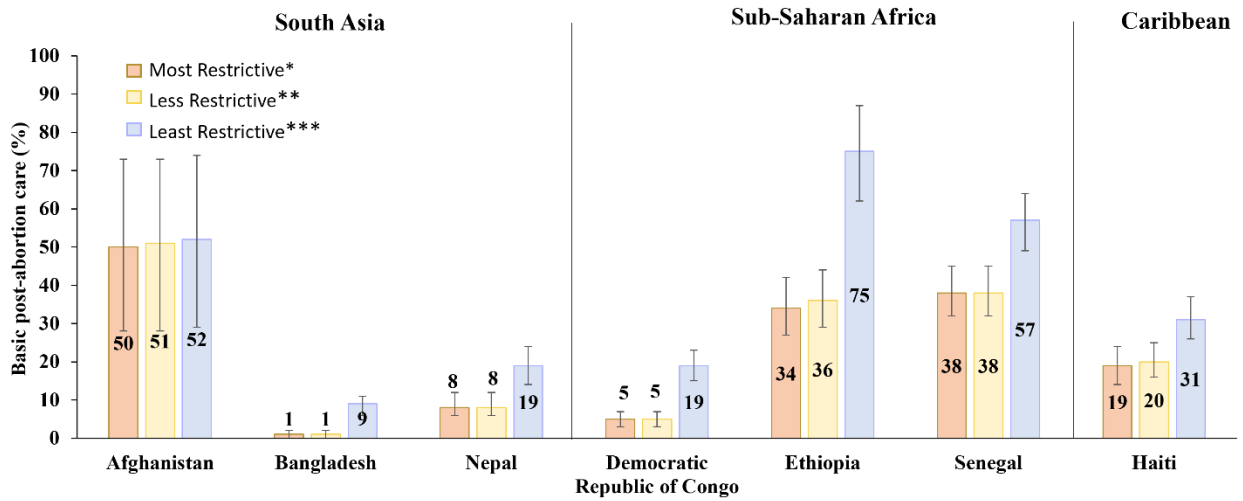

\*All indicators. \*\*Excluding staff with delivery ability for 24 h per day, 7 days per week. \*\*\*Excluding staff with delivery ability for 24 h per day, 7 days per week, and referral ability, including availability of short-acting, long-acting, or permanent family planning methods

**Figure S2.** Basic PAC capacity among primary-level facilities offering delivery services in seven LMICs, 2015–2024

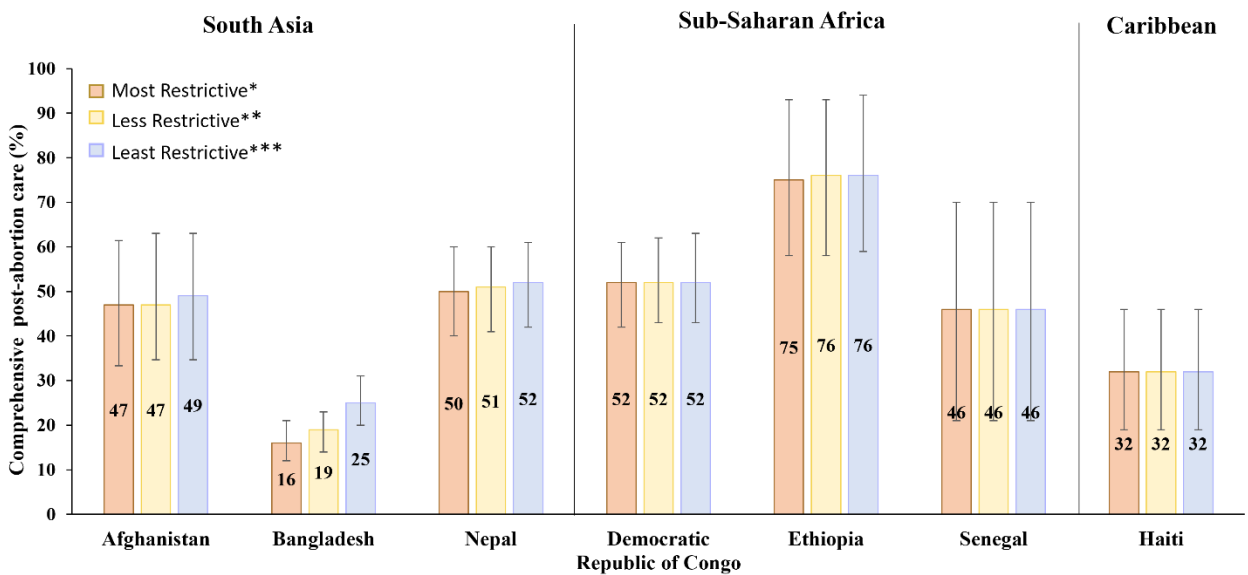

\*All indicators. \*\*Excluding staff with caesarean ability for 24 h per day, 7 days per week. \*\*\*Excluding ability to undertake major abdominal surgery and staff with caesarean ability for 24 h per day, 7 days per week.

**Figure S3.** Comprehensive PAC capacity among referral-level facilities offering delivery services in seven LMICs, 2015–2024

**Table S4.** Distribution of basic and comprehensive PAC capacity by facility type

| Variables                                                                                                                                                                                                         | Primary level | Afghanistan Referral level | Total       | Primary level | Bangladesh Primary level | Total       | Primary level | Nepal Referral level | Total       |
|-------------------------------------------------------------------------------------------------------------------------------------------------------------------------------------------------------------------|---------------|----------------------------|-------------|---------------|--------------------------|-------------|---------------|----------------------|-------------|
|                                                                                                                                                                                                                   | % (CI)        | % (CI)                     | % (CI)      | % (CI)        | % (CI)                   | % (CI)      | % (CI)        | % (CI)               | % (CI)      |
| <b>Basic PAC Capacity</b>                                                                                                                                                                                         |               |                            |             |               |                          |             |               |                      |             |
| Most restrictive (all indicators)                                                                                                                                                                                 | 50 (28, 73)   | 68 (56, 79)                | 58 (42, 72) | 1 (0, 3)      | 43 (36, 50)              | 12 (9, 14)  | 5 (3, 7)      | 25 (19, 32)          | 7 (5, 9)    |
| Less restrictive (excluding staff with delivery ability for 24 hours per day, 7 days per week)                                                                                                                    | 51 (28, 73)   | 71 (59, 81)                | 59 (44, 73) | 1 (0, 3)      | 44 (37, 51)              | 12 (9, 15)  | 5 (3, 7)      | 25 (19, 32)          | 7 (5, 9)    |
| Least restrictive (excluding staff with delivery ability for 24 hours per day, 7 days per week, and referral capacity; including availability of short-acting, long-acting, or permanent family planning methods) | 52 (29, 74)   | 65 (52, 76)                | 57 (42, 71) | 9 (6, 11)     | 43 (36, 50)              | 17 (11, 25) | 19 (16, 23)   | 52 (46, 59)          | 23 (20, 26) |
| <b>Comprehensive PAC Capacity</b>                                                                                                                                                                                 |               |                            |             |               |                          |             |               |                      |             |
| Most restrictive (all indicators)                                                                                                                                                                                 | 48 (26, 71)   | 47 (35, 60)                | 48 (33, 63) | 0.2 (0, 1)    | 16 (12, 21)              | 4 (3, 6)    | 6 (5, 9)      | 52 (45, 58)          | 11 (9, 13)  |
| Less restrictive (excluding staff with caesarean ability for 24 hours per day, 7 days per week)                                                                                                                   | 49 (27, 72)   | 47 (35, 60)                | 48 (34, 64) | 0.2 (0, 1)    | 19 (14, 23)              | 5 (4, 6)    | 6 (5, 9)      | 52 (45, 59)          | 11 (9, 13)  |
| Least restrictive (excluding ability to undertake major abdominal surgery and staff with caesarean ability for 24 h per day, 7 days per week)                                                                     | 49 (27, 72)   | 49 (37, 61)                | 49 (34, 64) | 0.2 (0, 1)    | 25 (20, 31)              | 7 (5, 8)    | 8 (6, 10)     | 52 (46, 59)          | 12 (10, 15) |

**Table S4 (Continued).** Distribution of PAC capacity by facility type

| Variables                                                                                                                                                                                                         | Democratic Republic of Congo |                          |                 | Primary level<br>% (CI) | Ethiopia                |                          |                 | Primary level<br>% (CI) | Senegal                 |                          |                 | Primary level<br>% (CI) | Haiti                   |                          |                 |
|-------------------------------------------------------------------------------------------------------------------------------------------------------------------------------------------------------------------|------------------------------|--------------------------|-----------------|-------------------------|-------------------------|--------------------------|-----------------|-------------------------|-------------------------|--------------------------|-----------------|-------------------------|-------------------------|--------------------------|-----------------|
|                                                                                                                                                                                                                   | Primary level<br>% (CI)      | Referral level<br>% (CI) | Total<br>% (CI) |                         | Primary level<br>% (CI) | Referral level<br>% (CI) | Total<br>% (CI) |                         | Primary level<br>% (CI) | Referral level<br>% (CI) | Total<br>% (CI) |                         | Primary level<br>% (CI) | Referral level<br>% (CI) | Total<br>% (CI) |
| <b>Basic PAC Capacity</b>                                                                                                                                                                                         |                              |                          |                 |                         |                         |                          |                 |                         |                         |                          |                 |                         |                         |                          |                 |
| Most restrictive (all indicators)                                                                                                                                                                                 | 5 (3, 7)                     | 25 (19, 32)              | 7 (5, 9)        | 34 (27, 42)             | 78 (72, 83)             | 39 (33, 46)              | 38 (32, 45)     | 62 (39, 81)             | 39 (33, 46)             | 19 (15, 24)              | 29 (19, 41)     | 21 (17, 25)             |                         |                          |                 |
| Less restrictive (excluding staff with delivery ability for 24 hours per day, 7 days per week)                                                                                                                    | 5 (3, 7)                     | 25 (19, 32)              | 7 (5, 9)        | 36 (29, 44)             | 79 (73, 84)             | 41 (34, 48)              | 38 (32, 45)     | 62 (39, 81)             | 39 (33, 46)             | 20 (16, 25)              | 29 (19, 41)     | 22 (18, 26)             |                         |                          |                 |
| Least restrictive (excluding staff with delivery ability for 24 hours per day, 7 days per week, and referral capacity; including availability of short-acting, long-acting, or permanent family planning methods) | 19 (16, 23)                  | 52 (46, 59)              | 23 (20, 26)     | 75 (68, 81)             | 87 (83, 91)             | 76 (70, 81)              | 57 (49, 64)     | 62 (39, 81)             | 57 (50, 64)             | 31 (26, 37)              | 38 (27, 51)     | 32 (28, 37)             |                         |                          |                 |
| <b>Comprehensive PAC Capacity</b>                                                                                                                                                                                 |                              |                          |                 |                         |                         |                          |                 |                         |                         |                          |                 |                         |                         |                          |                 |
| Most restrictive (all indicators)                                                                                                                                                                                 | 6 (5, 9)                     | 52 (45, 58)              | 11 (9, 13)      | 0 (0, 1)                | 75 (69, 81)             | 9 (7, 11)                | 1 (0, 2)        | 46 (25, 67)             | 3 (2, 5)                | 6 (4, 10)                | 32 (22, 44)     | 11 (8, 15)              |                         |                          |                 |
| Less restrictive (excluding staff with caesarean ability for 24 hours per day, 7 days per week)                                                                                                                   | 6 (5, 9)                     | 52 (45, 59)              | 11 (9, 13)      | 0 (0, 1)                | 76 (69, 81)             | 9 (7, 11)                | 1 (0, 2)        | 46 (25, 67)             | 3 (2, 5)                | 8 (5, 11)                | 32 (22, 44)     | 12 (9, 16)              |                         |                          |                 |
| Least restrictive (excluding ability to undertake major abdominal surgery and staff with caesarean ability for 24 h per day, 7 days per week)                                                                     | 8 (6, 10)                    | 52 (46, 59)              | 12 (10, 15)     | 0 (0, 1)                | 76 (70, 82)             | 9 (7, 11)                | 2 (1, 4)        | 46 (25, 67)             | 4 (3, 6)                | 9 (6, 13)                | 32 (22, 44)     | 13 (10, 17)             |                         |                          |                 |

**Table S5.** Availability of basic and comprehensive PAC signal functions among facilities that offer delivery services in seven LMICs

| Variables                                                                                                          | Afghanistan             |                          |                 | Bangladesh              |                          |                 | Nepal                   |                          |                 |
|--------------------------------------------------------------------------------------------------------------------|-------------------------|--------------------------|-----------------|-------------------------|--------------------------|-----------------|-------------------------|--------------------------|-----------------|
|                                                                                                                    | Primary level<br>% (CI) | Referral level<br>% (CI) | Total<br>% (CI) | Primary level<br>% (CI) | Referral level<br>% (CI) | Total<br>% (CI) | Primary level<br>% (CI) | Referral level<br>% (CI) | Total<br>% (CI) |
| Removal of retained products of conception                                                                         | 84 (54, 96)             | 97 (87, 99)              | 89 (70, 97)     | 39 (33, 47)             | 75 (69, 81)              | 49 (43, 55)     | 40 (35, 46)             | 79 (71, 85)              | 45 (40, 50)     |
| Administer parenteral antibiotics                                                                                  | 84 (61, 94)             | 92 (82, 97)              | 87 (74, 94)     | 29 (23, 36)             | 93 (89, 95)              | 45 (40, 51)     | 53 (47, 59)             | 88 (78, 94)              | 58 (52, 63)     |
| Administer parenteral uterotonics                                                                                  | 94 (86, 98)             | 92 (82, 97)              | 93 (87, 97)     | 50 (42, 57)             | 97 (95, 98)              | 62 (56, 67)     | 95 (91, 97)             | 96 (88, 99)              | 95 (92, 97)     |
| Administer intravenous fluids                                                                                      | 100                     | 100                      | 100             | 45 (38, 53)             | 94 (91, 96)              | 58 (52, 64)     | 99 (98, 100)            | 99 (98, 100)             | 99 (98, 100)    |
| Modern short-acting family planning methods available                                                              | 80 (58, 92)             | 90 (79, 96)              | 84 (71, 92)     | 98 (95, 99)             | 74 (67, 81)              | 92 (89, 94)     | 100                     | 89 (85, 93)              | 99 (98, 99)     |
| Capacity to communicate with referral facilities                                                                   | 91 (62, 98)             | 98 (87, 100)             | 94 (76, 99)     | 8 (9, 19)               | 91 (83, 91)              | 29 (27, 37)     | 82 (77, 86)             | 98 (96, 99)              | 84 (80, 88)     |
| Vehicle with fuel for referral                                                                                     | 93 (84, 97)             | 95 (86, 99)              | 94 (88, 97)     | 13 (5, 13)              | 87 (86, 94)              | 32 (25, 34)     | 31 (26, 37)             | 89 (81, 94)              | 39 (34, 44)     |
| Staff capable of undertaking vaginal deliveries available 24 hours per day, 7 days per week                        | 95 (87, 98)             | 95 (87, 99)              | 95 (90, 98)     | 48 (40, 55)             | 95 (91, 98)              | 60 (54, 66)     | 98 (96, 99)             | 97 (88, 99)              | 98 (96, 99)     |
| Administer a blood transfusion                                                                                     | 75 (50, 90)             | 78 (66, 87)              | 76 (61, 86)     | 2 (1, 5)                | 54 (47, 61)              | 15 (13, 19)     | 0 (0, 2)                | 76 (68, 83)              | 10 (8, 12)      |
| Undertake major abdominal surgery (proxied by provision of caesarean section)                                      | 84 (54, 96)             | 97 (87, 99)              | 89 (70, 97)     | 39 (33, 47)             | 75 (69, 81)              | 49 (43, 55)     | 0 (0, 0)                | 74 (66, 81)              | 10 (8, 11)      |
| Provided at least one long-acting, reversible family planning method or the permanent method at the time of survey | 84 (61, 94)             | 92 (82, 97)              | 87 (74, 94)     | 29 (23, 36)             | 93 (89, 95)              | 45 (40, 51)     | 66 (61, 72)             | 87 (81, 92)              | 69 (64, 74)     |
| Has staff capable of doing caesarean sections on duty or who are on call 24 hours per day, 7 days per week         | 94 (86, 98)             | 92 (82, 97)              | 93 (87, 97)     | 50 (42, 57)             | 97 (95, 98)              | 62 (56, 67)     | 0 (0, 0)                | 73 (65, 80)              | 9 (8, 11)       |



**Table S5 (Continued).** Distribution of PAC capacity by facility type.

| Variables                                                                                                          | Ethiopia      |                |            | Senegal       |                |            | Haiti         |                |             |            |             |            |
|--------------------------------------------------------------------------------------------------------------------|---------------|----------------|------------|---------------|----------------|------------|---------------|----------------|-------------|------------|-------------|------------|
|                                                                                                                    | Primary level | Referral level | Total      | Primary level | Referral level | Total      | Primary level | Referral level | Total       |            |             |            |
|                                                                                                                    | % (CI)        | % (CI)         | % (CI)     | % (CI)        | % (CI)         | % (CI)     | % (CI)        | % (CI)         | % (CI)      |            |             |            |
| Removal of retained products of conception                                                                         | 63 (59,67)    | 82 (77,86)     | 65 (61,69) | 86 (80,90)    | 97 (95,98)     | 87 (82,91) | 74 (68,80)    | 87 (64,96)     | 75 (69,80)  | 71 (65,76) | 82 (70,89)  | 73 (68,77) |
| Administer parenteral antibiotics                                                                                  | 79 (75,82)    | 95 (92,97)     | 80 (77,83) | 94 (90,96)    | 99 (98,100)    | 94 (91,97) | 77 (71,82)    | 96 (77,99)     | 78 (72,83)  | 84 (79,88) | 100         | 87 (83,90) |
| Administer parenteral uterotonics                                                                                  | 96 (94,97)    | 99 (98,100)    | 96 (94,97) | 99 (97,99)    | 99 (98,100)    | 99 (97,99) | 95 (92,97)    | 100            | 96 (92,98)  | 94 (90,96) | 98 (90,100) | 94 (92,96) |
| Administer intravenous fluids                                                                                      | 81 (77,84)    | 93 (88,96)     | 82 (79,85) | 97 (93,98)    | 96 (94,98)     | 97 (93,98) | 94 (90,96)    | 100            | 94 (90,96)  | 96 (93,98) | 100         | 97 (94,98) |
| Modern short-acting family planning methods available                                                              | 69 (65,73)    | 80 (73,86)     | 70 (66,74) | 99 (96,100)   | 95 (93,97)     | 98 (96,99) | 95 (83,99)    | 75 (50,90)     | 94 (84,98)  | 82 (77,86) | 59 (46,70)  | 78 (73,82) |
| Capacity to communicate with referral facilities                                                                   | 16 (13,20)    | 53 (46,59)     | 20 (17,23) | 88 (82,92)    | 100 (98,100)   | 89 (84,93) | 70 (62,76)    | 96 (77,99)     | 71 (63,77)  | 47 (41,52) | 66 (54,77)  | 50 (45,55) |
| Vehicle with fuel for referral                                                                                     | 51 (47,55)    | 66 (60,72)     | 52 (48,56) | 48 (40,56)    | 88 (84,91)     | 52 (45,59) | 77 (71,82)    | 100            | 78 (72,83)  | 75 (69,79) | 94 (85,98)  | 78 (74,82) |
| Staff capable of undertaking vaginal deliveries available 24 hours per day, 7 days per week                        | 96 (94,97)    | 98 (93,99)     | 96 (94,97) | 93 (87,96)    | 99 (98,100)    | 94 (89,97) | 99 (95,100)   | 100            | 99 (95,100) | 82 (77,86) | 98 (90,100) | 85 (81,88) |
| Administer a blood transfusion                                                                                     | 28 (25,32)    | 98 (96,99)     | 35 (32,39) | 1 (0,2)       | 87 (82,90)     | 10 (8,13)  | 4 (2,6)       | 79 (51,93)     | 7 (5,10)    | 19 (15,24) | 88 (77,94)  | 31 (27,36) |
| Undertake major abdominal surgery (proxied by provision of caesarean section)                                      | 63 (59,67)    | 82 (77,86)     | 65 (61,69) | 1 (0,2)       | 92 (89,95)     | 11 (9,13)  | 1 (1,3)       | 79 (51,93)     | 5 (3,8)     | 17 (13,22) | 86 (75,93)  | 29 (25,34) |
| Provided at least one long-acting, reversible family planning method or the permanent method at the time of survey | 79 (75,82)    | 95 (92,97)     | 80 (77,83) | 93 (88,96)    | 98 (97,99)     | 93 (89,96) | 99 (96,100)   | 100            | 99 (96,100) | 62 (56,67) | 84 (73,91)  | 66 (61,71) |
| Has staff capable of doing caesarean sections on duty or who are on call 24 hours per day, 7 days per week         | 96 (94,97)    | 99 (98,100)    | 96 (94,97) | 1 (0,2)       | 91 (87,94)     | 11 (8,13)  | 1 (1,3)       | 79 (51,93)     | 5 (3,8)     | 15 (11,19) | 81 (70,89)  | 27 (23,32) |

**Table S6.** Distribution of facilities with delivery services by survey years.

| Variables                                          | Afghanistan | Bangladesh |      |       | Nepal |      | Democratic Republic of Congo | Ethiopia | Senegal |       |      |      | Haiti |      |
|----------------------------------------------------|-------------|------------|------|-------|-------|------|------------------------------|----------|---------|-------|------|------|-------|------|
|                                                    | 2019        | 2014       | 2017 | 2015  | 2022  | 2018 | 2022                         | 2015     | 2016    | 2017  | 2018 | 2019 | 2013  | 2018 |
| No. of facilities with delivery services (n)       | 112         | 280        | 358  | 458   | 805   | 1328 | 217                          | 363      | 355     | 477   | 267  | 243  | 389   | 361  |
| Primary-level facilities (n)                       | 67          | 200        | 266  | 438   | 702   | 1196 | 193                          | 350      | 343     | 465   | 257  | 231  | 330   | 296  |
| Referral-level facilities (n)                      | 45          | 80         | 92   | 20    | 103   | 132  | 24                           | 13       | 12      | 12    | 10   | 12   | 59    | 65   |
| Basic PAC in primary-level facilities (%)          | 50          | 4          | 1    | 6     | 8     | 5    | 34                           | 16       | 19      | 18    | 39   | 38   | 12    | 19   |
| Comprehensive PAC in referral-level facilities (%) | 47          | 8          | 16   | 34    | 50    | 32   | 75                           | 32       | 51      | 45    | 58   | 46   | 25    | 32   |
| <i>P</i> -value*                                   |             | 0.016      |      | 0.103 |       |      |                              |          |         | 0.001 |      |      | 0.007 |      |
| <i>P</i> -value**                                  |             | 0.056      |      | 0.096 |       |      |                              |          |         | 0.24  |      |      | 0.195 |      |

\*Proportion test of the capacity of providing basic PAC in primary-level facilities between the oldest and most recent survey

\*\*Proportion test of the capacity of providing comprehensive PAC in referral-level facilities between the oldest and most recent survey

**Table S7.** Health and socioeconomic indicators in seven LMICs.

| Country                      | Population (2023) | Population Density (per km <sup>2</sup> ) | GDP (USD, 2023) | Health Expenditure (% of GDP) | Maternal Mortality Ratio (per 100,000 live births) | ANC Coverage (% of women with at least four visits) | Crude Birth Rate (per 1,000 people) | Total Fertility Rate (births per woman) | Contraceptive Rate (%) |
|------------------------------|-------------------|-------------------------------------------|-----------------|-------------------------------|----------------------------------------------------|-----------------------------------------------------|-------------------------------------|-----------------------------------------|------------------------|
| Afghanistan                  | ~42.2 million     | ~65                                       | \$14.5 billion  | ~11%                          | 620                                                | 21%                                                 | 35.1                                | 4.3                                     | 16%                    |
| Bangladesh                   | ~171.5 million    | ~1,169                                    | \$437.4 billion | ~2.36%                        | 123                                                | 47%                                                 | 18.5                                | 2.1                                     | 62%                    |
| Nepal                        | ~30.9 million     | ~210                                      | \$37.1 billion  | ~5.17%                        | 151                                                | 76%                                                 | 19.9                                | 1.8                                     | 50%                    |
| Democratic Republic of Congo | ~102 million      | ~41                                       | \$60 billion    | ~3.79%                        | 547                                                | 49%                                                 | 40.5                                | 6.11                                    | 20%                    |
| Ethiopia                     | ~126 million      | ~112                                      | \$156 billion   | ~3.48%                        | 267                                                | 62%                                                 | 31.5                                | 3.82                                    | 41%                    |
| Senegal                      | ~18 million       | ~85                                       | \$28 billion    | ~4.35%                        | 315                                                | 54%                                                 | 33.1                                | 4.34                                    | 23%                    |
| Haiti                        | ~12 million       | ~419                                      | \$21 billion    | ~3.48%                        | 529                                                | 45%                                                 | 23.9                                | 2.75                                    | 35%                    |

Source: <https://data.worldbank.org/>

**Table S8.** Country-specific recommendation on PAC service capacity

| Country     | Recommendations                                                                                                                                                                                                                                                                                                                                                                   |
|-------------|-----------------------------------------------------------------------------------------------------------------------------------------------------------------------------------------------------------------------------------------------------------------------------------------------------------------------------------------------------------------------------------|
| Afghanistan | Strengthen capabilities at referral facilities for blood transfusions to manage abortion-related emergencies.                                                                                                                                                                                                                                                                     |
| Bangladesh  | Prioritise an uninterrupted supply of essential commodities and medicines, strengthen communication and transportation systems, and ensure 24/7 staff availability at primary facilities. Additionally, bolster referral facilities with enhanced capabilities for blood transfusions, abdominal surgeries, and continuous staff availability for caesarean deliveries.           |
| Nepal       | Bolster PAC capacity by investing in reliable supply chains for essential commodities, establishing efficient communication and referral networks, and ensuring 24/7 staffing at primary facilities. Furthermore, enhance referral facilities with robust blood transfusion services, advanced surgical capabilities, and continuous staff availability for caesarean deliveries. |
| DRC         | Improve vehicle availability and fuel supply at primary facilities to facilitate effective patient transportation for referrals, reduce delays in emergency care.                                                                                                                                                                                                                 |
| Haiti       | Haiti must prioritise expanding the supply of modern short-acting family planning methods in referral facilities while ensuring functional transportation for referrals in primary facilities to bolster PAC service capacity.                                                                                                                                                    |
| Ethiopia    | Strengthen communication capabilities within primary facilities to improve PAC service provision and timely coordination of care.                                                                                                                                                                                                                                                 |
| Senegal     | Should work on increasing capacity for the removal of retained products of conception and improving vehicle availability and fuel supply at primary-level facilities.                                                                                                                                                                                                             |

**References (Supplementary)**

- 1 Campbell OMR, Aquino EML, Vwalika B, Gabrysch S. Signal functions for measuring the ability of health facilities to provide abortion services: An illustrative analysis using a health facility census in Zambia. *BMC Pregnancy Childbirth* 2016; **16**. DOI:10.1186/s12884-016-0872-5.
